# Supplementary material
Source: ML conference proceedings conference paper supplement (https://openreview.net/forum?id=8TyGCAuCGd)
Supplement: supplementary_material [file attachment]

## A PYBULLET EXPERIMENT CONFIGURATIONS

Table 3 shows the configuration used for each of the experiments with the PyBullet environments (Coumans & Bai, 2016). Then, specific details about the environments’ feature spaces are shown in Table 4.

Table 3: Configuration used for the PyBullet experiments.

| Parameter                        | Value                       |
|----------------------------------|-----------------------------|
| Discount factor $\gamma$         | 0.99                        |
| Maximum episode length           | 1,000                       |
| Algorithm                        | PPO (Schulman et al., 2017) |
| Epochs                           | 200                         |
| Steps per epoch                  | 4,000                       |
| Clip ratio                       | 0.2                         |
| Learning rate policy $\pi$       | 0.0003                      |
| Learning rate value function $v$ | 0.001                       |
| Training iterations $\pi$        | 80                          |
| Training iterations $v$          | 80                          |
| $\lambda$                        | 0.97                        |
| Target KL                        | 0.1                         |
| Policy $\pi$                     | MLP, $64 \times 64$         |
| Value function $v$               | MLP, $64 \times 64$         |
| Activation                       | Tanh                        |

Table 4: Feature space details for PyBullet environments.

| Parameter                 | Number of features |
|---------------------------|--------------------|
| XYZ body position (all)   | 3                  |
| XYZ body velocity (all)   | 3                  |
| Roll (all)                | 1                  |
| Pitch (all)               | 1                  |
| Joint positions Hopper    | 3                  |
| Joint velocities Hopper   | 3                  |
| Contact points Hopper     | 1                  |
| Joint positions Ant       | 8                  |
| Joint velocities Ant      | 8                  |
| Contact points Ant        | 4                  |
| Joint positions Humanoid  | 17                 |
| Joint velocities Humanoid | 17                 |
| Contact points Humanoid   | 2                  |

## B PADDLE ENVIRONMENT EXPERIMENT CONFIGURATIONS

Table 5 shows the environment configuration used for each of the experiments with the Paddle use case. Then, specific details about the random policy sampling experiments’ configuration are shown in Table 6.

## C TRAFFIC SIGNAL CONTROL EXPERIMENT CONFIGURATIONS

Table 7 shows the configuration used for each of the experiments with the RESCO benchmark (Ault & Sharon, 2021) for the Traffic Signal Control problem. Then, specific details about the experiments’ configuration are shown in Table 8.

Table 5: Configuration used in the Paddle Environment.

| Parameter                | Value                    |
|--------------------------|--------------------------|
| Discount factor $\gamma$ | 0.95                     |
| Algorithm                | DQN                      |
| Batch size               | 32                       |
| Number of episodes       | 600                      |
| $\epsilon_{\max}$        | 1.0                      |
| $\epsilon_{\min}$        | 0.01                     |
| $\epsilon$ decay         | 0.995                    |
| Policy                   | 2-layer MLP              |
| Hidden size              | 16                       |
| $\Delta_x$ ball          | 3 (baseline), 9 (hard)   |
| $\Delta_y$ ball          | 3 (baseline), 9 (hard)   |
| $\Delta_x$ paddle        | 20 (baseline), 60 (hard) |

Table 6: Paddle experiments configuration.

| Parameter           | Value  |
|---------------------|--------|
| Random policies     | 1,000  |
| Rollouts per policy | 150    |
| Right tail filter   | Top 5% |

Table 7: Configuration used for the Traffic Signal Control environments.

| Parameter                       | Value                                         |
|---------------------------------|-----------------------------------------------|
| Discount factor $\gamma$        | 0.99                                          |
| Algorithm                       | DQN                                           |
| Batch size                      | 32                                            |
| Number of episodes              | 100                                           |
| Target network update frequency | 500                                           |
| Policy                          | $2 \times 2$ conv. layer + MLP $64 \times 64$ |
| Step length                     | 10 seconds                                    |
| Length yellow signal            | 3 seconds                                     |
| Simulation length               | 1 hour                                        |

Table 8: Traffic Signal Control experiment configuration.

| Parameter           | Value  |
|---------------------|--------|
| Random policies     | 500    |
| Rollouts per policy | 7      |
| Right tail filter   | Top 5% |
